# Supplementary material for: The Role of Season, Sunlight, and Light Sensitivity in Self-Reported Depressive Symptoms by Adults With Visual Impairment
Source: PubMed Central journal article supplement — Transl Vis Sci Technol. 2024 Oct 1;13(10):2. doi: 10.1167/tvst.13.10.2 (PMC11451827; doi:10.1167/tvst.13.10.2), 2024-10-01
Supplement: tvst-13-10-2_s001.pdf [file tvst-13-10-2_s001.pdf]

# Supplementary Materials

**Supplementary Table 1.** Description of the seven studies that provided data for the current study

| Authors / Year          | Design / Aim                                                                                                                                                                   | Population                                                                                                                                                       | N of study | N included |
|-------------------------|--------------------------------------------------------------------------------------------------------------------------------------------------------------------------------|------------------------------------------------------------------------------------------------------------------------------------------------------------------|------------|------------|
| Van Nispen et al., 2011 | Cross-sectional study to find indications to improve care and referral pathways for visually impaired older adults with depressive symptoms                                    | Visually impaired older adults (50 years and older) from low vision service organisations in the Netherlands                                                     | 274        | 274        |
| Burggraaff et al., 2012 | RCT to investigate the effectiveness of closed-circuit televisions (CCTV) training                                                                                             | Visually impaired adults (aged 18 years or older) from low vision service organisations in the Netherlands                                                       | 111        | 111        |
| Van der Aa et al., 2013 | RCT to investigate the (cost-)effectiveness of a stepped care intervention to prevent depressive and anxiety disorders                                                         | Visually impaired older adults (50 years and older) from low vision service organisations in the Netherlands and Belgium                                         | 914        | 805*       |
| Bruijning et al., 2014  | Longitudinal study to provide more insight into the construct validity and interpretation of goals related to mental health aspects of the Dutch ICF Activity Inventory (D-AI) | Visually impaired adults (aged 18 years or older) from low vision service organisations in the Netherlands                                                       | 240        | 240        |
| Van Nispen et al., 2016 | Longitudinal study to investigate the (cost-)effectiveness of intensive rehabilitation of clients focused on the impact on functioning, participation and quality of life      | visually impaired adults (18 years and older) who are rehabilitating at the intensive rehabilitation centre of interest                                          | 74         | 74         |
| Van der Aa et al., 2017 | RCT to evaluate whether an intervention called E-PsEYE is costeffective in comparison with usual care                                                                          | Visually impaired older adults (50 years or older), who have retinal exudative diseases, receive antiVEGF treatment and have mild symptoms of depression/anxiety | 174        | 174        |
| Schakel et al., 2018    | Cross-sectional study to investigate societal costs of visual impairment and comorbid fatigue                                                                                  | Visually impaired adults (18 years and older) from low vision service organisations in the Netherlands and normally sighted adults                               | 480        | 247**      |
| Total                   |                                                                                                                                                                                |                                                                                                                                                                  | 2267       | 1925       |

\* Participants from Belgium (N=109) were excluded since weather data was not available for these people.

\*\* The control group (N=233) was excluded since these people did not have a visual impairment.

**Supplementary Table 2.** Logistic regression analyses of the possible effect modifiers in the association between season and clinically significant depressive symptoms (N=1.925)

| <b>Model 1<sup>b</sup></b>         | <b>OR</b>   | <b>95% Confidence Interval</b> | <b>P-value</b> |
|------------------------------------|-------------|--------------------------------|----------------|
| Winter (reference)                 | -           | -                              | -              |
| Spring                             | 0.77        | 0.55-1.08                      | 0.138          |
| Summer                             | 0.82        | 0.60-1.14                      | 0.241          |
| Fall                               | <b>0.68</b> | <b>0.50-0.93</b>               | <b>0.016</b>   |
| Blind                              | 0.84        | 0.41-1.70                      | 0.618          |
| Blind * Spring                     | 0.80        | 0.35-1.83                      | 0.603          |
| Blind * Summer                     | 0.81        | 0.35-1.85                      | 0.612          |
| Blind * Fall                       | 0.92        | 0.43-2.02                      | 0.839          |
| <b>Model 2<sup>b</sup></b>         |             |                                |                |
| Winter (reference)                 | -           | -                              | -              |
| Spring                             | 0.97        | 0.50-1.75                      | 0.811          |
| Summer                             | 1.04        | 0.52-1.80                      | 0.914          |
| Fall                               | 0.99        | 0.57-1.90                      | 0.903          |
| Sensitive to bright light          | <b>2.33</b> | <b>1.37-3.90</b>               | <b>0.001</b>   |
| Sensitive to bright light * Spring | 0.77        | 0.38-1.55                      | 0.464          |
| Sensitive to bright light * Summer | 0.82        | 0.40-1.67                      | 0.575          |
| Sensitive to bright light * Fall   | 0.58        | 0.27-1.16                      | 0.122          |
| <b>Model 3<sup>b</sup></b>         |             |                                |                |
| Winter (reference)                 | -           | -                              | -              |
| Spring                             | 0.88        | 0.60-1.30                      | 0.531          |
| Summer                             | 0.83        | 0.56-1.24                      | 0.372          |
| Fall                               | 0.75        | 0.51-1.10                      | 0.140          |
| Macular degeneration               | 0.98        | 0.64-1.51                      | 0.942          |
| Macular degeneration * Spring      | 0.62        | 0.33-1.16                      | 0.136          |
| Macular degeneration * Summer      | 0.90        | 0.48-1.64                      | 0.730          |
| Macular degeneration * Fall        | 0.78        | 0.44-1.39                      | 0.402          |
| <b>Model 4<sup>b</sup></b>         |             |                                |                |
| Winter (reference)                 | -           | -                              | -              |
| Spring                             | 0.75        | 0.54-1.04                      | 0.083          |
| Summer                             | <b>0.70</b> | <b>0.50-0.97</b>               | <b>0.031</b>   |
| Fall                               | <b>0.69</b> | <b>0.50-0.94</b>               | <b>0.020</b>   |
| Cataract                           | 1.14        | 0.67-1.94                      | 0.622          |
| Cataract * Spring                  | 1.06        | 0.44-2.54                      | 0.899          |
| Cataract * Summer                  | <b>2.41</b> | <b>1.10-5.28</b>               | <b>0.026</b>   |
| Cataract * Fall                    | 0.87        | 0.39-1.93                      | 0.727          |
| <b>Model 5<sup>b</sup></b>         |             |                                |                |
| Winter (reference)                 | -           | -                              | -              |
| Spring                             | <b>0.72</b> | <b>0.52-1.00</b>               | <b>0.048</b>   |
| Summer                             | 0.82        | 0.60-1.12                      | 0.211          |
| Fall                               | <b>0.68</b> | <b>0.50-0.93</b>               | <b>0.017</b>   |
| Glaucoma                           | 1.08        | 0.60-1.93                      | 0.802          |
| Glaucoma * Spring                  | 1.28        | 0.55-3.00                      | 0.567          |
| Glaucoma * Summer                  | 0.82        | 0.35-1.94                      | 0.654          |
| Glaucoma * Fall                    | 0.84        | 0.34-2.04                      | 0.683          |
| <b>Model 6<sup>b</sup></b>         |             |                                |                |
| Winter (reference)                 | -           | -                              | -              |
| Spring                             | 0.78        | 0.57-1.06                      | 0.109          |
| Summer                             | 0.84        | 0.62-1.13                      | 0.152          |
| Fall                               | <b>0.66</b> | <b>0.48-0.89</b>               | <b>0.007</b>   |
| Diabetic retinopathy               | 1.33        | 0.51-3.43                      | 0.558          |
| Diabetic retinopathy * Spring      | 0.38        | 0.08-1.70                      | 0.196          |
| Diabetic retinopathy * Summer      | 0.28        | 0.06-1.36                      | 0.115          |
| Diabetic retinopathy * Fall        | 1.09        | 0.33-3.55                      | 0.889          |
| <b>Model 7<sup>b</sup></b>         |             |                                |                |
| Winter (reference)                 | -           | -                              | -              |
| Spring                             | 0.74        | 0.54-1.01                      | 0.056          |
| Summer                             | 0.80        | 0.59-1.10                      | 0.155          |
| Fall                               | <b>0.64</b> | <b>0.48-0.87</b>               | <b>0.004</b>   |
| Retinitis Pigmentosa               | 0.59        | 0.21-1.90                      | 0.351          |
| Retinitis Pigmentosa * Spring      | 1.14        | 0.36-5.02                      | 0.867          |
| Retinitis Pigmentosa * Summer      | 0.69        | 0.13-3.61                      | 0.857          |

|                             |             |                  |              |
|-----------------------------|-------------|------------------|--------------|
| Retinitis Pigmentosa * Fall | <b>2.27</b> | <b>0.60-8.57</b> | <b>0.228</b> |
|-----------------------------|-------------|------------------|--------------|

---

OR: Odds Ratio; Bold is a statistically significant association  $p < 0.05$   
b. adjusted for age, sex, level of education, having paid work, visual acuity, comorbidity and household situation

**Supplementary Table 3.** Logistic regression analyses of the possible effect modifiers in the association between the hours of sunlight and clinically significant depressive symptoms (N=1.925)

| Model 1 <sup>b</sup>                          | OR           | 95% Confidence Interval | P-value      |
|-----------------------------------------------|--------------|-------------------------|--------------|
| Sunlight in hours                             | <b>0.995</b> | <b>0.992-0.999</b>      | <b>0.016</b> |
| Blind                                         | 0.753        | 0.351-1.819             | 0.467        |
| Blind * Sunlight in hours                     | 1.000        | 0.990-1.009             | 0.980        |
| Model 2 <sup>b</sup>                          |              |                         |              |
| Sunlight in hours                             | 0.998        | 0.992-1.004             | 0.552        |
| Sensitive to bright light                     | <b>2.150</b> | <b>1.254-3.698</b>      | <b>0.006</b> |
| Sensitive to bright light * sunlight in hours | 0.997        | 0.990-1.004             | 0.410        |
| Model 3 <sup>b</sup>                          |              |                         |              |
| Sunlight in hours                             | 0.996        | 0.991-1.000             | 0.076        |
| Macular degeneration                          | 0.865        | 0.545-1.374             | 0.540        |
| Macular degeneration * sunlight in hours      | 0.998        | 0.992-1.005             | 0.741        |
| Model 4 <sup>b</sup>                          |              |                         |              |
| Sunlight in hours                             | <b>0.995</b> | <b>0.992-0.999</b>      | <b>0.012</b> |
| Cataract                                      | 1.147        | 0.621-2.116             | 0.661        |
| Cataract * sunlight in hours                  | 1.003        | 0.894-1.013             | 0.506        |
| Model 5 <sup>b</sup>                          |              |                         |              |
| Sunlight in hours                             | 0.996        | 0.993-1.000             | 0.051        |
| Glaucoma                                      | 1.724        | 0.868-3.424             | 0.120        |
| Glaucoma * Sunlight in hours                  | 0.991        | 0.980-1.002             | 0.127        |
| Model 6 <sup>b</sup>                          |              |                         |              |
| Sunlight in hours                             | <b>0.996</b> | <b>0.993-1.000</b>      | <b>0.044</b> |
| Diabetic retinopathy                          | 2.238        | 0.819-6.114             | 0.116        |
| Diabetic retinopathy * sunlight in hours      | 0.984        | 0.968-1.000             | 0.054        |
| Model 7 <sup>b</sup>                          |              |                         |              |
| Sunlight in hours                             | <b>0.995</b> | <b>0.992-0.999</b>      | <b>0.014</b> |
| Retinitis Pigmentosa                          | 0.809        | 0.256-2.556             | 0.718        |
| Retinitis Pigmentosa * sunlight in hours      | 0.989        | 0.981-1.016             | 0.838        |

OR: Odds Ratio; Bold is a statistically significant association  $p < 0.05$

b. adjusted for age, sex, level of education, having paid work, visual acuity, comorbidity and household situation

**Supplementary Table 4.** Logistic regression analyses of the possible effect modifiers in the association between sensitivity to bright light and clinically significant depressive symptoms (N=1.925)

| Model 1 <sup>b</sup>                               | OR          | 95% Confidence Interval | P-value          |
|----------------------------------------------------|-------------|-------------------------|------------------|
| Sensitivity to bright light                        | <b>1.85</b> | <b>1.36-2.51</b>        | <b>&lt;0.001</b> |
| Blind                                              | 0.83        | 0.38-1.81               | 0.831            |
| Blind * Sensitivity to bright light                | 0.87        | 0.44-1.73               | 0.683            |
| <b>Model 2<sup>b</sup></b>                         |             |                         |                  |
| Sensitivity to bright light                        | <b>1.62</b> | <b>1.14-2.31</b>        | <b>0.008</b>     |
| Macular degeneration                               | 0.65        | 0.40-1.06               | 0.084            |
| Macular degeneration * Sensitivity to bright light | 1.31        | 0.75-2.31               | 0.342            |
| <b>Model 3<sup>b</sup></b>                         |             |                         |                  |
| Sensitivity to bright light                        | <b>1.78</b> | <b>1.35-2.35</b>        | <b>&lt;0.001</b> |
| Cataract                                           | 1.35        | 0.75-2.44               | 0.315            |
| Cataract * Sensitivity to bright light             | 1.07        | 0.53-2.13               | 0.854            |
| <b>Model 4<sup>b</sup></b>                         |             |                         |                  |
| Sensitivity to bright light                        | <b>0.78</b> | <b>1.36-2.34</b>        | <b>&lt;0.001</b> |
| Glaucoma                                           | 0.96        | 0.48-1.94               | 0.910            |
| Glaucoma * Sensitivity to bright light             | 1.08        | 0.50-2.42               | 0.823            |
| <b>Model 5<sup>b</sup></b>                         |             |                         |                  |
| Sensitivity to bright light                        | <b>1.74</b> | <b>1.34-2.27</b>        | <b>&lt;0.001</b> |
| Diabetic retinopathy                               | 0.44        | 0.13-1.46               | 0.178            |
| Diabetic retinopathy * Sensitivity to bright light | 2.33        | 0.63-8.60               | 0.203            |
| <b>Model 6<sup>b</sup></b>                         |             |                         |                  |
| Sensitivity to bright light                        | <b>1.88</b> | <b>1.44-2.48</b>        | <b>&lt;0.001</b> |
| Retinitis Pigmentosa                               | 1.44        | 0.60-3.44               | 0.416            |
| Retinitis Pigmentosa * Sensitivity to bright light | 0.38        | 0.13-1.11               | 0.076            |

OR: Odds Ratio; Bold is a statistically significant association  $p < 0.05$

b. adjusted for age, sex, level of education, having paid work, visual acuity, comorbidity and household situation

**Supplementary Table 5.** Sensitivity analyses for the association between season and clinically significant depressive symptoms encompassing various models from two different datasets (Pre multiple imputation dataset and dataset with exclusion normally sighted participants)

| <b>PRE-MULTIPLE IMPUTATION</b>     |             |                                |                |
|------------------------------------|-------------|--------------------------------|----------------|
| <b>Model 1<sup>a</sup></b>         | <b>OR</b>   | <b>95% Confidence Interval</b> | <b>P-value</b> |
| Winter (reference)                 | -           | -                              | -              |
| Spring                             | <b>0.73</b> | <b>0.54-0.97</b>               | <b>0.031</b>   |
| Summer                             | 0.77        | 0.58-1.03                      | 0.078          |
| Fall                               | <b>0.65</b> | <b>0.49-0.86</b>               | <b>0.003</b>   |
| <b>Model 2<sup>b</sup></b>         |             |                                |                |
| Winter (reference)                 | -           | -                              | -              |
| Spring                             | <b>0.68</b> | <b>0.49-0.95</b>               | <b>0.022</b>   |
| Summer                             | 0.75        | 0.54-1.04                      | 0.084          |
| Fall                               | <b>0.65</b> | <b>0.47-0.89</b>               | <b>0.007</b>   |
| <b>Model 3<sup>b</sup></b>         |             |                                |                |
| Winter (reference)                 | -           | -                              | -              |
| Spring                             | 0.72        | 0.50-1.03                      | 0.072          |
| Summer                             | 0.78        | 0.55-1.12                      | 0.179          |
| Fall                               | <b>0.64</b> | <b>0.45-0.90</b>               | <b>0.011</b>   |
| Blind                              | 0.76        | 0.37-1.55                      | 0.447          |
| Blind * Spring                     | 0.74        | 0.30-1.79                      | 0.498          |
| Blind * Summer                     | 0.74        | 0.30-1.82                      | 0.507          |
| Blind * Fall                       | 1.09        | 0.47-2.50                      | 0.846          |
| <b>Model 4<sup>b</sup></b>         |             |                                |                |
| Winter (reference)                 | -           | -                              | -              |
| Spring                             | 0.90        | 0.43-1.88                      | 0.772          |
| Summer                             | 0.87        | 0.42-1.82                      | 0.712          |
| Fall                               | 1.01        | 0.51-1.99                      | 0.981          |
| Sensitive to bright light          | <b>2.22</b> | <b>1.21-4.06</b>               | <b>0.010</b>   |
| Sensitive to bright light * Spring | 0.82        | 0.35-1.92                      | 0.653          |
| Sensitive to bright light * Summer | 1.01        | 0.43-2.35                      | 0.984          |
| Sensitive to bright light * Fall   | 0.62        | 0.28-1.36                      | 0.229          |
| <b>Model 5<sup>b</sup></b>         |             |                                |                |
| Winter (reference)                 | -           | -                              | -              |
| Spring                             | 0.77        | 0.50-1.18                      | 0.278          |
| Summer                             | 0.78        | 0.50-1.22                      | 0.277          |
| Fall                               | 0.89        | 0.45-1.05                      | 0.086          |
| Macular degeneration               | 0.93        | 0.58-1.49                      | 0.768          |
| Macular degeneration * Spring      | 0.72        | 0.37-1.41                      | 0.338          |
| Macular degeneration * Summer      | 0.92        | 0.48-1.78                      | 0.807          |
| Macular degeneration * Fall        | 0.89        | 0.47-1.67                      | 0.715          |
| <b>Model 6<sup>b</sup></b>         |             |                                |                |
| Winter (reference)                 | -           | -                              | -              |
| Spring                             | <b>0.70</b> | <b>0.49-1.00</b>               | <b>0.048</b>   |
| Summer                             | <b>0.68</b> | <b>0.47-0.97</b>               | <b>0.035</b>   |
| Fall                               | <b>0.69</b> | <b>0.49-0.97</b>               | <b>0.036</b>   |
| Cataract                           | 1.30        | 0.72-2.34                      | 0.379          |
| Cataract * Spring                  | 0.93        | 0.35-2.43                      | 0.877          |
| Cataract * Summer                  | 2.00        | 0.85-4.72                      | 0.114          |
| Cataract * Fall                    | 0.65        | 0.27-1.58                      | 0.343          |
| <b>Model 7<sup>b</sup></b>         |             |                                |                |
| Winter (reference)                 | -           | -                              | -              |
| Spring                             | <b>0.68</b> | <b>0.47-0.96</b>               | <b>0.031</b>   |
| Summer                             | 0.78        | 0.65-1.11                      | 0.160          |
| Fall                               | <b>0.69</b> | <b>0.49-0.96</b>               | <b>0.029</b>   |
| Glaucoma                           | 1.25        | 0.65-2.41                      | 0.499          |
| Glaucoma * Spring                  | 1.05        | 0.40-2.70                      | 0.928          |
| Glaucoma * Summer                  | 0.76        | 0.29-1.99                      | 0.581          |
| Glaucoma * Fall                    | 0.57        | 0.21-1.56                      | 0.270          |
| <b>Model 8<sup>b</sup></b>         |             |                                |                |
| Winter (reference)                 | -           | -                              | -              |
| Spring                             | <b>0.71</b> | <b>0.50-0.99</b>               | <b>0.043</b>   |
| Summer                             | 0.78        | 0.66-1.09                      | 0.148          |
| Fall                               | <b>0.63</b> | <b>0.45-0.87</b>               | <b>0.006</b>   |

|                                                     |             |                  |              |
|-----------------------------------------------------|-------------|------------------|--------------|
| Diabetic retinopathy                                | 1.41        | 0.51-3.92        | 0.514        |
| Diabetic retinopathy * Spring                       | 0.44        | 0.08-2.25        | 0.321        |
| Diabetic retinopathy * Summer                       | 0.40        | 0.08-2.06        | 0.272        |
| Diabetic retinopathy * Fall                         | 1.17        | 0.33-4.12        | 0.810        |
| <b>Model 9<sup>b</sup></b>                          |             |                  |              |
| Winter (reference)                                  | -           | -                | -            |
| Spring                                              | <b>0.68</b> | <b>0.48-0.95</b> | <b>0.023</b> |
| Summer                                              | 0.76        | 0.54-1.06        | 0.108        |
| Fall                                                | <b>0.62</b> | <b>0.45-0.86</b> | <b>0.004</b> |
| Retinitis Pigmentosa                                | 0.66        | 0.23-1.92        | 0.443        |
| Retinitis Pigmentosa * Spring                       | 1.14        | 0.24-5.43        | 0.872        |
| Retinitis Pigmentosa * Summer                       | 0.57        | 0.07-3.67        | 0.554        |
| Retinitis Pigmentosa * Fall                         | 2.18        | 0.54-8.76        | 0.273        |
| <b>EXCLUSION OF PARTICIPANTS WITH NORMAL VISION</b> |             |                  |              |
| <b>Model 1<sup>a</sup></b>                          |             |                  |              |
| Winter (reference)                                  | -           | -                | -            |
| Spring                                              | 0.72        | 0.51-1.01        | 0.059        |
| Summer                                              | 0.73        | 0.52-1.02        | 0.063        |
| Fall                                                | <b>0.61</b> | <b>0.43-0.81</b> | <b>0.004</b> |
| <b>Model 2<sup>b</sup></b>                          |             |                  |              |
| Winter (reference)                                  | -           | -                | -            |
| Spring                                              | <b>0.67</b> | <b>0.47-0.96</b> | <b>0.027</b> |
| Summer                                              | <b>0.70</b> | <b>0.50-0.98</b> | <b>0.036</b> |
| Fall                                                | <b>0.57</b> | <b>0.41-0.81</b> | <b>0.001</b> |
| <b>Model 3<sup>b</sup></b>                          |             |                  |              |
| Winter (reference)                                  | -           | -                | -            |
| Spring                                              | 0.69        | 0.46-1.03        | 0.066        |
| Summer                                              | 0.71        | 0.48-1.03        | 0.074        |
| Fall                                                | <b>0.56</b> | <b>0.38-0.82</b> | <b>0.003</b> |
| Blind                                               | 0.95        | 0.45-1.99        | 0.885        |
| Blind * Spring                                      | 0.89        | 0.38-2.10        | 0.797        |
| Blind * Summer                                      | 0.92        | 0.39-2.17        | 0.855        |
| Blind * Fall                                        | 1.09        | 0.48-2.49        | 0.832        |
| <b>Model 4<sup>b</sup></b>                          |             |                  |              |
| Winter (reference)                                  | -           | -                | -            |
| Spring                                              | 0.74        | 0.36-1.53        | 0.410        |
| Summer                                              | 0.82        | 0.39-1.70        | 0.585        |
| Fall                                                | 0.77        | 0.39-1.51        | 0.441        |
| Sensitive to bright light                           | <b>1.90</b> | <b>1.06-3.40</b> | <b>0.031</b> |
| Sensitive to bright light * Spring                  | 0.92        | 0.41-2.08        | 0.842        |
| Sensitive to bright light * Summer                  | 0.85        | 0.36-2.00        | 0.713        |
| Sensitive to bright light * Fall                    | 0.71        | 0.33-1.56        | 0.396        |
| <b>Model 5<sup>b</sup></b>                          |             |                  |              |
| Winter (reference)                                  | -           | -                | -            |
| Spring                                              | 0.82        | 0.62-1.28        | 0.377        |
| Summer                                              | 0.72        | 0.45-1.14        | 0.155        |
| Fall                                                | 0.66        | 0.42-1.03        | 0.070        |
| Macular degeneration                                | 1.03        | 0.64-1.86        | 0.901        |
| Macular degeneration * Spring                       | 0.61        | 0.30-1.22        | 0.159        |
| Macular degeneration * Summer                       | 0.93        | 0.47-1.83        | 0.834        |
| Macular degeneration * Fall                         | 0.73        | 0.38-1.42        | 0.256        |
| <b>Model 6<sup>b</sup></b>                          |             |                  |              |
| Winter (reference)                                  | -           | -                | -            |
| Spring                                              | 0.69        | 0.47-1.01        | 0.056        |
| Summer                                              | <b>0.61</b> | <b>0.42-0.89</b> | <b>0.011</b> |
| Fall                                                | <b>0.62</b> | <b>0.43-0.90</b> | <b>0.011</b> |
| Cataract                                            | 1.17        | 0.65-2.11        | 0.595        |
| Cataract * Spring                                   | 0.88        | 0.34-2.35        | 0.796        |
| Cataract * Summer                                   | 2.26        | 0.93-5.47        | 0.071        |
| Cataract * Fall                                     | 0.60        | 0.24-1.63        | 0.286        |
| <b>Model 7<sup>b</sup></b>                          |             |                  |              |
| Winter (reference)                                  | -           | -                | -            |

|                               |             |                  |                  |
|-------------------------------|-------------|------------------|------------------|
| Spring                        | <b>0.65</b> | <b>0.44-0.95</b> | <b>0.027</b>     |
| Summer                        | 0.73        | 0.50-1.05        | 0.087            |
| Fall                          | <b>0.60</b> | <b>0.41-0.86</b> | <b>0.006</b>     |
| Glaucoma                      | 1.14        | 0.60-2.17        | 0.684            |
| Glaucoma * Spring             | 1.26        | 0.50-3.17        | 0.627            |
| Glaucoma * Summer             | 0.75        | 0.29-1.92        | 0.545            |
| Glaucoma * Fall               | 0.74        | 0.28-1.96        | 0.542            |
| <b>Model 8<sup>b</sup></b>    |             |                  |                  |
| Winter (reference)            | -           | -                | -                |
| Spring                        | 0.71        | 0.50-1.01        | 0.054            |
| Summer                        | 0.72        | 0.61-1.03        | 0.069            |
| Fall                          | <b>0.54</b> | <b>0.38-0.77</b> | <b>&lt;0.001</b> |
| Diabetic retinopathy          | 1.45        | 0.41-4.45        | 0.817            |
| Diabetic retinopathy * Spring | 0.21        | 0.02-2.21        | 0.192            |
| Diabetic retinopathy * Summer | 0.39        | 0.07-2.32        | 0.302            |
| Diabetic retinopathy * Fall   | 1.77        | 0.41-7.62        | 0.446            |
| <b>Model 9<sup>b</sup></b>    |             |                  |                  |
| Winter (reference)            | -           | -                | -                |
| Spring                        | <b>0.67</b> | <b>0.47-0.95</b> | <b>0.026</b>     |
| Summer                        | 0.71        | 0.50-1.00        | 0.050            |
| Fall                          | <b>0.55</b> | <b>0.38-0.78</b> | <b>&lt;0.001</b> |
| Retinitis Pigmentosa          | 0.62        | 0.21-1.78        | 0.370            |
| Retinitis Pigmentosa * Spring | 1.20        | 0.26-5.50        | 0.814            |
| Retinitis Pigmentosa * Summer | 0.67        | 0.12-3.63        | 0.643            |
| Retinitis Pigmentosa * Fall   | 2.25        | 0.55-9.16        | 0.258            |

OR: Odds Ratio; Bold is a statistically significant association  $p < 0.05$

a. unadjusted

b. adjusted for age, sex, level of education, having paid work, visual acuity, comorbidity and household situation



**Supplementary Table 6. Sensitivity analyses for the association between the hours of sunlight and clinically significant depressive symptoms encompassing various models from different datasets (Pre multiple imputation dataset, dataset with exclusion of normally sighted adults and dataset with exclusion of participants without information about their residence)**

| <b>PRE-MULTIPLE IMPUTATION</b>                      |              |                                |                |
|-----------------------------------------------------|--------------|--------------------------------|----------------|
| <b>Model 1</b>                                      | <b>OR</b>    | <b>95% Confidence Interval</b> | <b>P-value</b> |
| Sunlight in hours                                   | <b>0.995</b> | <b>0.991-0.998</b>             | <b>0.001</b>   |
| <b>Model 2<sup>b</sup></b>                          |              |                                |                |
| Sunlight in hours                                   | <b>0.996</b> | <b>0.992-0.999</b>             | <b>0.019</b>   |
| <b>Model 3<sup>b</sup></b>                          |              |                                |                |
| Sunlight in hours                                   | <b>0.996</b> | <b>0.992-1.000</b>             | <b>0.036</b>   |
| Blind                                               | 0.710        | 0.316-0.987                    | 0.404          |
| Blind * Sunlight in hours                           | 0.999        | 0.989-1.010                    | 0.911          |
| <b>Model 4<sup>b</sup></b>                          |              |                                |                |
| Sunlight in hours                                   | 0.998        | 0.991-1.005                    | 0.606          |
| Sensitive to bright light                           | <b>2.020</b> | <b>1.074-3.801</b>             | <b>0.029</b>   |
| Sensitive to bright light * sunlight in hours       | 0.998        | 0.990-1.007                    | 0.739          |
| <b>Model 5<sup>b</sup></b>                          |              |                                |                |
| Sunlight in hours                                   | 0.996        | 0.991-1.001                    | 0.097          |
| Macular degeneration                                | 0.835        | 0.498-1.401                    | 0.496          |
| Macular degeneration * sunlight in hours            | 1.000        | 0.992-1.007                    | 0.953          |
| <b>Model 6<sup>b</sup></b>                          |              |                                |                |
| Sunlight in hours                                   | <b>0.995</b> | <b>0.991-0.999</b>             | <b>0.017</b>   |
| Cataract                                            | 1.031        | 0.515-2.063                    | 0.931          |
| Cataract * sunlight in hours                        | 1.005        | 0.894-1.016                    | 0.357          |
| <b>Model 7<sup>b</sup></b>                          |              |                                |                |
| Sunlight in hours                                   | 0.996        | 0.993-1.000                    | 0.068          |
| Glaucoma                                            | 1.558        | 0.727-3.339                    | 0.254          |
| Glaucoma * Sunlight in hours                        | 0.993        | 0.981-1.005                    | 0.254          |
| <b>Model 8<sup>b</sup></b>                          |              |                                |                |
| Sunlight in hours                                   | 0.996        | 0.993-1.00                     | 0.057          |
| Diabetic retinopathy                                | 2.196        | 0.764-6.256                    | 0.145          |
| Diabetic retinopathy * sunlight in hours            | 0.988        | 0.972-1.004                    | 0.152          |
| <b>Model 9<sup>b</sup></b>                          |              |                                |                |
| Sunlight in hours                                   | <b>0.996</b> | <b>0.992-0.999</b>             | <b>0.023</b>   |
| Retinitis Pigmentosa                                | 0.889        | 0.271-2.810                    | 0.846          |
| Retinitis Pigmentosa * sunlight in hours            | 0.998        | 0.980-1.016                    | 0.816          |
| <b>EXCLUSION OF PARTICIPANTS WITH NORMAL VISION</b> |              |                                |                |
| <b>Model 1<sup>a</sup></b>                          |              |                                |                |
| <b>Sunlight in hours</b>                            | <b>0.996</b> | <b>0.992-1.000</b>             | <b>0.036</b>   |
| <b>Model 2<sup>b</sup></b>                          |              |                                |                |
| <b>Sunlight in hours</b>                            | <b>0.996</b> | <b>0.992-1.000</b>             | <b>0.039</b>   |
| <b>Model 3<sup>b</sup></b>                          |              |                                |                |
| Sunlight in hours                                   | 0.996        | 0.992-1.001                    | 0.093          |
| Blind                                               | 0.975        | 0.438-2.171                    | 0.950          |
| Blind * Sunlight in hours                           | 0.999        | 0.990-1.009                    | 0.917          |
| <b>Model 4<sup>b</sup></b>                          |              |                                |                |
| Sunlight in hours                                   | 1.000        | 0.992-1.008                    | 0.096          |
| Sensitive to bright light                           | <b>2.236</b> | <b>1.161-4.313</b>             | <b>0.015</b>   |

|                                                                            |              |                    |              |
|----------------------------------------------------------------------------|--------------|--------------------|--------------|
| Sensitive to bright light * sunlight in hours                              | 0.995        | 0.986-1.004        | 0.307        |
| <b>Model 5<sup>b</sup></b>                                                 |              |                    |              |
| Sunlight in hours                                                          | 0.997        | 0.991-1.002        | 0.206        |
| Macular degeneration                                                       | 0.897        | 0.525-1.531        | 0.689        |
| Macular degeneration * sunlight in hours                                   | 0.999        | 0.992-1.007        | 0.780        |
| <b>Model 6<sup>b</sup></b>                                                 |              |                    |              |
| Sunlight in hours                                                          | 0.996        | 0.992-1.000        | 0.058        |
| Cataract                                                                   | 1.072        | 0.524-2.191        | 0.850        |
| Cataract * sunlight in hours                                               | 1.003        | 0.992-1.014        | 0.838        |
| <b>Model 7<sup>b</sup></b>                                                 |              |                    |              |
| Sunlight in hours                                                          | 0.997        | 0.993-1.002        | 0.213        |
| Glaucoma                                                                   | 1.834        | 0.868-3.876        | 0.112        |
| Glaucoma * Sunlight in hours                                               | 0.990        | 0.978-1.003        | 0.120        |
| <b>Model 8<sup>b</sup></b>                                                 |              |                    |              |
| Sunlight in hours                                                          | <b>0.988</b> | <b>0.979-9.98</b>  | <b>0.006</b> |
| Diabetic retinopathy                                                       | 3.307        | 0.861-11.379       | 0.958        |
| Diabetic retinopathy * sunlight in hours                                   | 0.982        | 0.953-1.000        | 0.054        |
| <b>Model 9<sup>b</sup></b>                                                 |              |                    |              |
| Sunlight in hours                                                          | 0.996        | 0.992-1.000        | 0.069        |
| Retinitis Pigmentosa                                                       | 0.828        | 0.249-2.750        | 0.758        |
| Retinitis Pigmentosa * sunlight in hours                                   | 0.998        | 0.980-1.017        | 0.856        |
| <b>EXCLUSION OF PARTICIPANTS WITHOUT INFORMATION ABOUT THEIR RESIDENCE</b> |              |                    |              |
| <b>Model 1<sup>a</sup></b>                                                 |              |                    |              |
| <b>Sunlight in hours</b>                                                   | <b>0.995</b> | <b>0.991-0.999</b> | <b>0.012</b> |
| <b>Model 2<sup>b</sup></b>                                                 |              |                    |              |
| <b>Sunlight in hours</b>                                                   | <b>0.995</b> | <b>0.991-0.999</b> | <b>0.018</b> |
| <b>Model 3<sup>b</sup></b>                                                 |              |                    |              |
| Sunlight in hours                                                          | <b>0.995</b> | <b>0.992-0.999</b> | <b>0.019</b> |
| Blind                                                                      | 0.603        | 0.240-1511         | 0.279        |
| Blind * Sunlight in hours                                                  | 1.000        | 0.989-1.011        | 0.976        |
| <b>Model 4<sup>b</sup></b>                                                 |              |                    |              |
| Sunlight in hours                                                          | 0.996        | 0.988-1.004        | 0.314        |
| Sensitive to bright light                                                  | <b>1.990</b> | <b>1.012-3.919</b> | <b>0.046</b> |
| Sensitive to bright light * sunlight in hours                              | 1.000        | 0.991-1.009        | 0.874        |
| <b>Model 5<sup>b</sup></b>                                                 |              |                    |              |
| Sunlight in hours                                                          | 0.9          | 0.991-1.001        | 0.099        |
| Macular degeneration                                                       | 0.825        | 0.483-1.409        | 0.481        |
| Macular degeneration * sunlight in hours                                   | 0.999        | 0.992-1.007        | 0.827        |
| <b>Model 6<sup>b</sup></b>                                                 |              |                    |              |
| Sunlight in hours                                                          | <b>0.995</b> | <b>0.991-0.999</b> | <b>0.024</b> |
| Cataract                                                                   | 1.351        | 0.666-2.742        | 0.404        |
| Cataract * sunlight in hours                                               | 1.003        | 0.894-1.013        | 0.567        |
| <b>Model 7<sup>b</sup></b>                                                 |              |                    |              |
| 8                                                                          |              |                    |              |
| Sunlight in hours                                                          | 0.997        | 0.981-1.001        | 0.118        |
| Glaucoma                                                                   | <b>2.678</b> | <b>1.219-5.877</b> | <b>0.014</b> |
| Glaucoma * Sunlight in hours                                               | 0.989        | 0.977-1.001        | 0.079        |
| <b>Model 8<sup>b</sup></b>                                                 |              |                    |              |
| Sunlight in hours                                                          | 0.996        | <b>0.992-1.000</b> | <b>0.053</b> |
| Diabetic retinopathy                                                       | 3.075        | 0.892-10.601       | 0.075        |
| Diabetic retinopathy * sunlight in hours                                   | 0.986        | 0.968-1.005        | 0.144        |

| Model 9 <sup>b</sup>                     |              |                    |              |
|------------------------------------------|--------------|--------------------|--------------|
| Sunlight in hours                        | <b>0.995</b> | <b>0.991-0.999</b> | <b>0.023</b> |
| Retinitis Pigmentosa                     | 0.813        | 0.119-5.569        | 0.833        |
| Retinitis Pigmentosa * sunlight in hours | 1.230        | 0.627-2.413        | 0.546        |

OR: Odds Ratio; Bold is a statistically significant association  $p < 0.05$

a. unadjusted

b. adjusted for age, sex, level of education, having paid work, visual acuity, comorbidity and household situation

**Supplementary Table 7.** Sensitivity analyses for the association between sensitivity to bright light and clinically significant depressive symptoms encompassing various models from different datasets (Pre multiple imputation dataset and dataset with exclusion of participants with normal vision)

| <b>PRE-MULTIPLE IMPUTATION</b>                      |             |                                |                  |
|-----------------------------------------------------|-------------|--------------------------------|------------------|
| <b>Model 1<sup>a</sup></b>                          | <b>OR</b>   | <b>95% Confidence Interval</b> | <b>P-value</b>   |
| Sensitivity to bright light                         | <b>1.93</b> | <b>1.50-2.49</b>               | <b>&lt;0.001</b> |
| <b>Model 2<sup>b</sup></b>                          |             |                                |                  |
| Sensitivity to bright light                         | <b>1.87</b> | <b>1.40-2.48</b>               | <b>&lt;0.001</b> |
| <b>Model 3<sup>b</sup></b>                          |             |                                |                  |
| Sensitivity to bright light                         | <b>1.93</b> | <b>1.41-2.64</b>               | <b>&lt;0.001</b> |
| Blind                                               | 0.82        | 0.36-1.89                      | 0.648            |
| Blind * Sensitivity to bright light                 | 0.81        | 0.38-1.73                      | 0.590            |
| <b>Model 4<sup>b</sup></b>                          |             |                                |                  |
| Sensitivity to bright light                         | <b>1.66</b> | <b>1.15-2.39</b>               | <b>0.007</b>     |
| Macular degeneration                                | 0.69        | 0.40-1.06                      | 0.184            |
| Macular degeneration * Sensitivity to bright light  | 1.36        | 0.76-2.45                      | 0.299            |
| <b>Model 5<sup>b</sup></b>                          |             |                                |                  |
| Sensitivity to bright light                         | <b>1.82</b> | <b>1.34-2.48</b>               | <b>&lt;0.001</b> |
| Cataract                                            | 1.24        | 0.62-2.48                      | 0.545            |
| Cataract * Sensitivity to bright light              | 1.18        | 0.53-2.64                      | 0.693            |
| <b>Model 6<sup>b</sup></b>                          |             |                                |                  |
| Sensitivity to bright light                         | <b>1.84</b> | <b>1.36-2.49</b>               | <b>&lt;0.001</b> |
| Glaucoma                                            | 0.94        | 0.42-2.10                      | 0.870            |
| Glaucoma * Sensitivity to bright light              | 1.13        | 0.45-2.81                      | 0.801            |
| <b>Model 7<sup>b</sup></b>                          |             |                                |                  |
| Sensitivity to bright light                         | <b>1.74</b> | <b>1.30-2.32</b>               | <b>&lt;0.001</b> |
| Diabetic retinopathy                                | 0.18        | 0.02-1.36                      | 0.096            |
| Diabetic retinopathy * Sensitivity to bright light  | 2.25        | 0.89-5.47                      | 0.65             |
| <b>Model 8<sup>b</sup></b>                          |             |                                |                  |
| Sensitivity to bright light                         | <b>1.96</b> | <b>1.48-2.64</b>               | <b>&lt;0.001</b> |
| Retinitis Pigmentosa                                | 1.45        | 0.53-3.85                      | 0.465            |
| Retinitis Pigmentosa * Sensitivity to bright light  | 0.42        | 0.13-1.35                      | 0.145            |
| <b>EXCLUSION OF PARTICIPANTS WITH NORMAL VISION</b> |             |                                |                  |
| <b>Model 1<sup>a</sup></b>                          |             |                                |                  |
| Sensitivity to bright light                         | <b>1.82</b> | <b>1.37-2.44</b>               | <b>&lt;0.001</b> |
| <b>Model 2<sup>b</sup></b>                          |             |                                |                  |
| Sensitivity to bright light                         | <b>1.68</b> | <b>1.25-2.26</b>               | <b>&lt;0.001</b> |
| <b>Model 3<sup>b</sup></b>                          |             |                                |                  |
| Sensitivity to bright light                         | <b>1.73</b> | <b>1.20-2.49</b>               | <b>0.003</b>     |
| Blind                                               | 1.00        | 0.44-2.30                      | 0.996            |
| Blind * Sensitivity to bright light                 | 0.88        | 0.43-1.83                      | 0.737            |
| <b>Model 4<sup>b</sup></b>                          |             |                                |                  |
| Sensitivity to bright light                         | <b>1.53</b> | <b>1.01-2.32</b>               | <b>0.046</b>     |
| Macular degeneration                                | 0.69        | 0.40-1.20                      | 0.191            |
| Macular degeneration * Sensitivity to bright light  | 1.27        | 0.65-2.49                      | 0.483            |
| <b>Model 5<sup>b</sup></b>                          |             |                                |                  |

|                                                    |             |                  |                  |
|----------------------------------------------------|-------------|------------------|------------------|
| Sensitivity to bright light                        | <b>1.66</b> | <b>1.21-2.28</b> | <b>0.002</b>     |
| Cataract                                           | 1.20        | 0.61-2.37        | 0.597            |
| Cataract * Sensitivity to bright light             | 1.08        | 0.50-2.37        | 0.841            |
| <b>Model 6<sup>b</sup></b>                         |             |                  |                  |
| Sensitivity to bright light                        | <b>0.70</b> | <b>1.24-2.33</b> | <b>&lt;0.001</b> |
| Glaucoma                                           | 1.11        | 0.52-2.37        | 0.782            |
| Glaucoma * Sensitivity to bright light             | 0.91        | 0.40-2.11        | 0.832            |
| <b>Model 7<sup>b</sup></b>                         |             |                  |                  |
| Sensitivity to bright light                        | <b>1.63</b> | <b>1.21-2.20</b> | <b>0.001</b>     |
| Diabetic retinopathy                               | 0.63        | 0.17-2.37        | 0.490            |
| Diabetic retinopathy * Sensitivity to bright light | 1.90        | 0.44-8.29        | 0.391            |
| <b>Model 8<sup>b</sup></b>                         |             |                  |                  |
| Sensitivity to bright light                        | <b>1.79</b> | <b>1.32-2.48</b> | <b>&lt;0.001</b> |
| Retinitis Pigmentosa                               | 1.60        | 0.63-4.08        | 0.322            |
| Retinitis Pigmentosa * Sensitivity to bright light | 0.34        | 0.11-1.07        | 0.065            |

OR: Odds Ratio; Bold is a statistically significant association  $p < 0.05$

a. unadjusted

b. adjusted for age, sex, level of education, having paid work, visual acuity, comorbidity and household situation
